# Supplementary material
Source: publisher figshare collection journal article supplement (https://sage.figshare.com/ndownloader/files/16840232)
Supplement: Supplementary file 1 [file 16840232]

Supplementary file 5

Table 5. Bony syngnathia.

| Authors | Journal | Year published | Fusion | type | cleft palate | aglossia/  microglossia | hypoplastic proximal mandible | TMJ  ankylosis | Other head and neck anomalies | other associated anomalies |
| --- | --- | --- | --- | --- | --- | --- | --- | --- | --- | --- |
| Kettner | Dtsch Med Wochenschr | 1907 | Maxillomandibular | 2a | Y | Y | N | N | prominet sublingual ridges | limb anomalies |
| Davis | Surg Gynecol Obstet | 1935 | Maxillomandibular | 2b | N | N | N | Y |  |  |
| Burket | J Am Med Assoc | 1936 | unilateral maxillomandibular | 2b | N | N | Y | Y | hemifacial atrophy, left Hornor's syndrome, port wine stains |  |
| Hochstetter | Dtsch Med Wochenschr | 1948 | bilateral Maxillomandibular | 1 | Y | N | N | N |  |  |
| Petterson | Acta chir Scand | 1961 | bilateral Maxillomandibular | 2a | Y | Y | Y | N | absent alveolar ridges | limb anomaly |
| Salleh | Oral Surg | 1965 | unilateral maxillomandibular | 1 | N | N | Y | N |  |  |
| Hoggins | Br J Oral Surg | 1969 | midline maxillomandibular | 2a | Y | Y | N | N |  | limb anomalies |
| Bernard R | Pediatrie | 1971 | midline maxillomandibular | 2a | N | Y | N | N |  | limb anomalies |
| Alvarez | Br J Plast Surg | 1976 | bilateral Maxillomandibular | 2a | N | Y | N | N | micrognathia | limb anomalies |
| RM Shah | teratology | 1977 | bilateral Maxillomandibular | 2a | Y | Y | N | N |  |  |
| Miskinyar | Plas Recon Surg | 1979 | unilateral maxillomandibular | 1 | N | N | N | N |  | none |
| Dobrow B | J Clin Dysmorphol | 1983 | bilateral Maxillomandibular | 2b | Y | Y | Y | N | bilateral coloboma, micropthalmos, probable right facial palsy | pilonidal dimple |
| Kittur SD | J Clin Dysmorphol | 1983 | bilateral Maxillomandibular | 2b | Y | Y | Y | N |  |  |
| JR Simpson, MD Maves | Otol head and neck Surg | 1985 | complete zygomaticomaxillomandibular | 2b | Y | Y | Y | N | hypoplastic TMJ, midface hypoplasia | none |
| Nwoku, Kekere-Ekun | J Maxillofac Surg | 1986 | bilateral Maxillomandibular | 1 | N | N | N | N |  |  |
| Brown DM, Marsh JL | Cleft Palate J | 1990 | bilateral Maxillomandibular | 2b | Y | N | Y | Y | hypoplastic ears | Dandy walker malformation, TOF, hypoplastic urogenital tract |
| Traaholt, Lars M | Plas Recon Surg | 1990 | unilateral maxillomandibular | ? | Y | N | N | N | complete right cleft lip, down-slanting eyes, ankyloblepharon | none |
| Goodacre, Wallace | Br J Plast Surg | 1990 | bilateral Maxillomandibular | 1 | N | N | N | Y | exophthalmos | none |
|  |  |  | bilateral Maxillomandibular | N/A | N/A | N/A | N/A | N/A | anomalies not in detail |  |
| Agrawal K | Ann Plast Surg | 1993 | bilateral Maxillomandibular | 1 | N | N | N | N | mandibular hypoplasia |  |
| MG Gartlan | Ann Otol Thinol Laryngol | 1993 | midline maxillomandibular | 2b | Y | N | Y | Y |  | bilateral leg and arm amputation, fused knees, hyperflexed hips, malformed left lower arm and hand |
| Arshad, Goh | Br J Plast Surg | 1994 | bilateral Maxillomandibular | 1 | N | N | N | N | none | none |
|  |  |  | midline maxillomandibular | 2a | N | Y | N | N |  |  |
| S Kamata, K Satoh, T Uemura | Br J Plast Surg | 1996 | bilateral zygomaticomaxillomandibular | 2b | N | N | Y | Y | mandibular hypoplasia, bilateral low set ears, absent right external auditory meatus | none |
| Behnia H, Shamse MG | J Oral Maxillofac Surg | 1996 | unilateral maxillomandibular | 2b | N | N | Y | Y | left facial hypoplasia, coloboma, beaklike nose, low set ears, preauricular skin tags | |
| Rao S, Oak S | Br J Plast Surg | 1997 | midline maxillomandibular | 2a | N | Y | N | N | bifid anterior 2/3 tongue, cleft of mandible |  |
| KH Dawson | cleft palate craniofacial J | 1997 | bilateral Maxillomandibular | 2a | Y | Y | N | N | microstomia | difficient extremities, |
| KH Dawson | cleft palate craniofacial J | 1997 | unilateral maxillomandibular | 2b | N | N | Y | Y | left face soft tissue hypoplasia, left facial nerve weakness, left orbit inferiorly displaced, left hypoplastic maxilla | mosaic trisomy 8, left polycystic kidney, patent ductus arteriosus, hypothyroidism, and type 1 diabetes melitus. |
| KH Dawson | cleft palate craniofacial J | 1997 | unilateral maxillomandibular | 2b | N | N | Y | Y | general facial hypoplasia |  |
| KH Dawson | cleft palate craniofacial J | 1997 | unilateral maxillomandibular | 2b | Y | N | Y | Y | orbital dystopia, cleft tessier type 6, right coloboma, right face hypoplasia, hypoplasia and inferiror displacement of right ear. |  |
| KH Dawson | cleft palate craniofacial J | 1997 | unilateral maxillomandibular | 2b | Y | N | Y | Y | small ear tags bilerally, classic Treacher Collins sydrome with deficient zygoma |  |
| Ugurlu | J Craniofac Surg | 1999 | Bilateral maxillomandibular | 2b | N | N | Y | Y | flat nose, hypertelorism, hypoplastic mandible, median cleft mandible |  |
| Yazdi, Fakhree | Arch Iran Med | 2000 | bilateral Maxillomandibular | 1 | N | N | N | N |  |  |
| B Knoll, D Karas, JA Persing | Craniofac Surg | 2000 | bilateral Maxillomandibular | 2a | N | Y | Y | N | bony shelf on the palate's lingual surface, soft tissue mass between the oral floor and the maxilla, micrognathia, unilateral choanal atresia, constricted left ear, flattened nasal tip | limited both elbow flexion, contracture of left wrist and PIP joints, extended right wrist and fingers with hypoplastic right thumb, ectrodactyly of index, ring and little fingers, left club foot |
| Z. Laster, D. Temkin, Y. Zarfin et al | Int. J. Oral Maxillofac. Surg | 2001 | bilateral zygomaticomaxillomandibular | 2a | Y | N | N | N | Palatal cleft, antimongoloid slant of the palpebral fissures, colobomata in the lateral aspect of the lower eyelid, epicanthal folds, long abundant eyelashes with brush like appearance, and low-set ears. | N/A |
| Verloes A | Clin Dysmorphol | 2004 | unilateral maxillomandibular | 2b | N | N | Y | N | coloboma, facial asymmetry, microcephaly, narrow forehead, upslanted palpebral fissures, round dystrophic ears, midface hypoplsia, retrognathism mental retard | vertebral segmentation defect |
| John Spencer M. Daniels | J Craniofac Surg | 2004 | bilateral Maxillomandibular | 1 | N | N | N | N | bilateral bony fusion between the zygomatic bones, maxillary tuberosities and the ascending and horizontal rami of the mandible | none |
| JS Daniels | J Craniomaxillofac Surg | 2004 | bilateral zygomaticomaxillomandibular | 2b | N | N | Y | N | micrognathism |  |
| ugurlu K, Karsidag S | J Craniofac Surg | 2005 | bilateral zygomaticomaxillomandibular | 2b | N | N | Y | N | significant mandibular hypoplasia |  |
| Nikolic S | J Oral Maxillofac Surg | 2006 | unilateral maxillomandibular | 1 | N | N | N | N | none | none |
| Shams MG | Oral Surg Oral Med Oral Pathol Oral Radiol Endod | 2006 | unilateral maxillomandibular | 1 | N | N | N | N | obstruction of left lacrimal duct | none |
| Mir MA | Internet J Plast Surg | 2007 | bilateral Maxillomandibular | 1 | N | N | N | N | none | none |
| DJ Trigg, IT Mau, KW Rosbe | Arch Orolaryngol Head Neck Surg | 2007 | bilateral Maxillomandibular | 1 | N | N | N | N | micrognathia, mild midface hypoplasia | micrognathia |
| Vahidi K | J Ultrasound Med | 2007 | bilateral Maxillomandibular | 2b | N | N | Y | N | severe micrognathia | none |
| Gupta RK | J Pediatr Surg | 2008 | bilateral Maxillomandibular | 2b | N | N | Y | N | mandibular hypoplasia and retrognathia | none |
| Ajike SO, Adeosun OO | Niger J Clin Path | 2008 | bilateral Maxillomandibular | 2b | N | N | Y | N | microretrognathia | pectus excavatum, craniosynostosis |
| Poovazhagi V | Pediatric Oncall | 2009 | bilateral Maxillomandibular | 2b | N | N | Y | N | hypoplasia of mandible | none |
| MC Jongmans, R Pfundt | Clin Dysmorphol | 2010 | bilateral Maxillomandibular | 2b | N | N | Y | N | triangular face with a broad nasal tip, severe mandibular hypoplasia, bilateral choanal atresia | Bilateral single palmar creases, brachydactyly and adducted thumbs, anus was placed anteriorly and the penis was rather small, abnormal segmentation of the left lung, ASD |
| E Konaş, G Tunçbilek | J Craniofac Surg | 2010 | unilateral maxillomandibular | 2b | Y | N | Y | N | micrognathia, cleft palate (right palatal shelf and components of the soft palate were missing) | double-outlet right ventricle, transposition of the major vessels, VSD, pulmonary stenosis |
| El-Hakim IE, Al-Sebaei MO | Int J Oral Maxillofac Surg | 2010 | bilateral zygomaticomaxillomandibular | 1 | N | N | N | N | retruded mandible | none |
| VG Naikmasur, AP Sattur | Cleft Palate Craniofac J | 2010 | unilateral maxillomandibular | 2b | N | N | Y | Y | retruded mandible, adhesion of the left commissural and retrocommissural soft tissues to the fused arches, absence of the left buccal vestibule | none |
| R. Halli, V. Kharkara, Y. Kinib | Int J Oral Maxillofac Surg | 2010 | unilateral zygomaticomaxillomandibular | 2b | N | N | Y | Y | everted lower lip,facial asymmetry, hemifacial hypoplasia of the left side and an antimongoloid slant of left eye with a classical bird face deformity | none |
| H. R. Fallahi, M. Naeini | Int J Oral Maxillofac Surg | 2010 | unilateral zygomaticomaxillomandibular | 1 | N | N | N | N | large earlobes, auricular sinuses, bilateral abnormal lateral canthal fissure | none |
| Koeda S | J Oral Maxillofac Surg | 2010 | unilateral maxillomandibular | 2b | N | N | Y | N |  |  |
| LP Martín, MM Pérez | Craniomaxillofac Trauma Reconstr | 2011 | bilateral Maxillomandibular | 2b | Y | N | Y | N | frontonasal dysmorphism (biﬁd anterior cranium, hypertelorism, blepharophimosis, broad nasal bridge, and broad nasal tip), low set ears, a short neck, biﬁd and protrusive tongue, covered with lanugo, inferior lip and buccolabial sulci malformation, macrostomia | double image of vertebral bodies in the cervical level, minor hiatal hernia |
| A Hegab, A ElMadawy, WM Shawkat | Int J Oral Maxillofac Surg | 2012 | bilateral zygomaticomaxillomandibular | 2b | N | N | Y | N | N/A | N/A |
|  |  | 2012 | bilateral zygomaticomaxillomandibular | 2b | N | N | Y | N | N/A | N/A |
|  |  | 2012 | Unilateral zygomaticomaxillomandibular, unilateral maxillomandibular | 2b | N | N | Y | N | N/A | N/A |
| DP Tauro, NK Kallappanavar | Cleft Palate Craniofac J | 2012 | Unilateral zygomaticomaxillomandibular, unilateral maxillomandibular | 1 | N | N | N | N | unilateral anophthalmic orbit | none |
| GC Rezende, AK Pereira | J Med Ultrasonics | 2013 | bilateral Maxillomandibular | 2b | N | N | Y | N | bilateral microphthalmia, small low-set ears, microcephaly, craniosynostosis, prominent forehead, wide palpebral ﬁssures with outer edges unfused, tufts of hair on the scalp, high nasal bridge, broad nasal dorsum and depressed nasal tip, short nasolabial distance | N/A |
| AE Madi, K Khattala | J Neonat Surg | 2014 | bilateral Maxillomandibular | 1 | N | N | N | N | retrognathia | N/A |
| E Konaş, G Tunçbilek | J Craniofac Surg | 2015 | bilateral zygomaticomaxillomandibular | 2b | Y | Y | Y | N | microstomia | N/A |
| SD Patel,S Porras, M Lypka | J Craniomaxillofac Surg | 2015 | unilateral maxillomandibular | ? | N | N | N | N | coloboma of left pupil, hypertelorbitism, disrupted left nasolacrimal system, palpable hard and soft tissue mass at the left cheek with irregularity of overlying skin with mucous drainage, maxillary duplication, cleft of left nasal floor extended to left ala and bony cleft of left nasal floor extending into the left medial orbital rim, left choanal stenosis | situs inversus, dextrocardia, coarctation of aorta |
| L Mahgoub, C Joynt, R Bhargava | Cleft Palate Craniofac J | 2015 | unilateral maxillomandibular | 2b | N | N | Y | Y | dysplastic left TMJ, midline mandibular cleft, mild hypertelorism, mild frontal bossing, low nasal bridge, upward slant to palpebral ﬁssures, and micrognathia, absent septum pellucidum, optic nerve hypoplasia, middle interhemispheric fusion, azygous artery | butterﬂy and hemi-vertebrae at the thoracolumbar region (from the 10th thoracic to the 2nd lumbar vertebrae, hypomelanosis of Ito at trunk |
| AB Ozer, U Karatepe, AY Altun | J Clin Anesth | 2016 | unilateral maxillomandibular | 2b | N | N | Y | Y | N/A | N/A |
| M Broome, Y Via, S Jacquemont | Pediatr Neonatol | 2016 | bilateral zygomaticomaxillomandibular | 2b | Y | N | Y | N | right paramedian palatine cleft, left choanal atresia, microstomia, severe micrognathia, brachycephaly, low set ears, complete bilateral deafness | micropenis with distal hypospadias, bilateral cryptorchidism, camptodactyly with adductus thumbs, clinodactyly, partial syndactyly of second and third toes, single umbilical artery |
| A Khasgiwala, S Jangam | Contemp Clin Dent | 2016 | bilateral Maxillomandibular | 1 | N | N | N | N | none | TE fistula type C |
| AH Al-Mahdi, DA Koppel | J Craniofac Surg | 2016 | bilateral zygomaticomaxillomandibular | 1 | N | N | N | N | none | none |
| J Rough, DI Hindin | J Craniofac Surg | 2016 | Unilateral zygomaticomaxillomandibular | 2b | N | N | Y | N | facial asymmetry (Right lower face hypoplasia) | central abdominal omphalocele and ASD and immature retinal vascularization |
| Kumar S, et al. | Br J Oral Maxillofac Surg | 2016 | Unilateral zygomaticomaxillomandibular | 1 | N | N | N | N | atrophic skin adjacent to the commissures adhered firmly to the underlying tissues | N/A |
| Özel A, et al. | Br J Oral Maxillofac Surg | 2016 | Unilateral zygomaticomaxillomandibular | 2b | N | N | Y | N | deviated chin to the left with retruded mandible | N/A |
| YK Sarin, P Raj, M Arya | J Neonat Surg | 2017 | bilateral Maxillomandibular | 2b | Y | N | Y | Y | side cleft palate, retrognathia and micrognathia, microcephaly | N/A |
| MC Casas, RS Giana | Taiwan J Obstet Gynecol | 2018 | bilateral Maxillomandibular | 1 | N | N | N | N | wide, low and flatten base of nose, forked tongue, agenesis of corpus callosum, widening sella turcica | widening and flattening of cervical vertebra, hidden spina bifida at LS region |

References

Agrawal K, Chandra SS, Sreekumar N. Congenital bilateral intermaxillary bony fusion. *Annals of plastic surgery.* 1993;30(2):163-166.

Ajike SO, Adeosun OO, Adebayo ET, Anyiam JO, Jalo I, Chom ND. Congenital bilateral fusion of the maxillomandibular alveolar processes with craniosynostosis: report of a rare case. *Niger J Clin Pract.* Mar 2008;11(1):77-80.

Al-Mahdi AH, Koppel DA, Al-Jumaily HA, Mohammed AA, Boyd D. Congenital Bilateral Zygomatico-Maxillo-Mandibular Fusion Associated With Gum Fusion. *J Craniofac Surg.* Jan 2016;27(1):e20-23.

Alvarez GE. The aglossia-adactylia syndrome. *Br J Plast Surg.* Apr 1976;29(2):175-178.

Arshad AR, Goh CS. Hypoglossia congenita with anterior maxillo-mandibular fusion. *British journal of plastic surgery.* 1994;47(2):139-141.

Behnia H, Shamse MG. Congenital unilateral fusion of the mandibular and maxillary alveolar ridges, temporomandibular joint, and coronoid process: A case report. *Journal of oral and maxillofacial surgery.* 1996;54(6):773-776.

Bernard R, Giraud F, Lachard J, et al. Aglossia-adactylia syndrome with anterior bimaxillary synostosis. *Pediatrie.* 1971;26(8):877.

Broome M, Vial Y, Jacquemont S, Sergi C, Kamnasaran D, Giannoni E. Complete Maxillo-Mandibular Syngnathia in a Newborn with Multiple Congenital Malformations. *Pediatr Neonatol.* Feb 2016;57(1):65-68.

Brown DM, Marsh JL. Agnathia and associated malformations: a case report. *Cleft Palate Journal.* 1990;27(4):415-418.

Burket LW. Congenital bony temporomandibular ankylosis and facial hemiatrophy: review of the literature and report of a case. *Journal of the American Medical Association.* 1936;106(20):1719-1722.

Casas MC, Giana RS, Andújar MA, Hernández NA, Mialdea AL. Oral malformation with complete maxillomandibular bone fusion (Congenital Syngnathia). *Taiwanese Journal of Obstetrics and Gynecology.* 2018;57(2):325-326.

Daniels JS. Congenital maxillomandibular fusion: a case report and review of the literature. *J Craniomaxillofac Surg.* Jun 2004;32(3):135-139.

Davis W. Congenital deformities of the face. *Surg Gynecol Obstet.* 1935;61:201-209.

Dawson KH, Gruss JS, Myall RW. Congenital bony syngnathia: a proposed classification. *Cleft Palate Craniofac J.* Mar 1997;34(2):141-146.

Dobrow B. Syndrome identification case report 96: syngnethia and multipule defects. *J Clin Dysmorphol.* 1983;1:5-7.

El Madi A, Khattala K, Rami M, Bouabdallah Y. Bilateral maxillo-mandibular syngnathia in a newborn. *J Neonatal Surg.* Oct-Dec 2014;3(4):53.

El-Hakim IE, Al-Sebaei MO, Abuzennada S, AlYamani AO. Congenital fusion of the maxilla and mandible (congenital bony syngnathia). *Int J Oral Maxillofac Surg.* Sep 2010;39(9):933-936.

Fallahi HR, Naeini M, Mahmoudi M, Javaherforoosh F. Congenital zygomatico-maxillo-mandibular fusion: a brief case report and review of literature. *Int J Oral Maxillofac Surg.* Sep 2010;39(9):930-933.

Gartlan MG, Davies J, Smith RJH. Congenital Oral Synechiae. *Ann Oto Rhinol Laryn.* Mar 1993;102(3):186-197.

Goodacre TE, Wallace AF. Congenital alveolar fusion. *Br J Plast Surg.* Mar 1990;43(2):203-209.

Gupta RK, Jadhav V, Gupta A, Sanghvi B, Shah H, Parelkar S. Congenital alveolar fusion. *Journal of pediatric surgery.* 2008;43(8):1421-1425.

Halli R, Kharkar V, Kini Y, Rudagi BM. Congenital unilateral maxillo-mandibulo-zygomatic fusion (syngnathia): a case report in an 8-year-old boy. *Int J Oral Maxillofac Surg.* May 2010;39(5):500-502.

Hegab A, ElMadawy A, Shawkat W. Congenital maxillomandibular fusion: a report of three cases. *International journal of oral and maxillofacial surgery.* 2012;41(10):1248-1252.

Hochstetter F. *Über zwei Fälle epithelialer Syngnathie bei menschlichen Keimlingen*: Springer-Verlag in Komm.; 1948.

Hoggins G. Aglossia congenita with bony fusion of the jaws. *British Journal of Oral Surgery.* 1969;7(1):63-65.

Jongmans MC, Pfundt R, Hehir-Kwa JY, Brunner HG, Kerstjens-Frederikse WS. Choanal atresia, syngnathia, brachydactyly, mental retardation and short stature: an X-linked syndrome? *Clin Dysmorphol.* Jan 2010;19(1):30-32.

Kamata S, Satoh K, Uemura T, Onizuka T. Congenital bilateral zygomatico-mandibular fusion with mandibular hypoplasia. *Br J Plast Surg.* Jun 1996;49(4):251-253.

Kettner. Kongenitaler Zungendefekt. *Dtsch Med Wochenschr.* 1907;33:532-534.

Khasgiwala A, Jangam S, Sharma S, Newaskar V. Congenital bilateral syngnathia and tracheoesophageal fistula: A rare presentation. *Contemp Clin Dent.* Oct-Dec 2016;7(4):566-568.

Kittur SD, Weaver DD, Maves MD. Syndrome identification case report 95: congenital fusion of the gums and jaws. *J Clin Dysmorphol.* Summer 1983;1(2):2-4.

Knoll B, Karas D, Persing JA, Shin J. Complete congenital bony syngnathia in a case of oromandibular limb hypogenesis syndrome. *J Craniofac Surg.* Jul 2000;11(4):398-404.

Koeda S, Suzuki T, Nei H, et al. A case of congenital unilateral maxillo-mandibular bony fusion in an 8-year-old girl. *Asian Journal of Oral and Maxillofacial Surgery.* 2010;22(4):220-224.

Konas E, Aliyev A, Tunçbilek G. Congenital maxillomandibular syngnathia: a new management technique using distraction techniques. *Journal of Craniofacial Surgery.* 2015;26(1):e68-e70.

Konas E, Tuncbilek G, Kayikcioglu A, Ozgur F. Congenital bony syngnathia with unilateral palatal shelf and soft palate agenesis. *J Craniofac Surg.* Sep 2010;21(5):1645-1647.

Kumar S, Bhati B, Kukreja P, Mishra V, Bhatnagar A. Isolated bony syngnathia. *British Journal of Oral and Maxillofacial Surgery.* 2016;54(7):844-845.

Laster Z, Temkin D, Zarfin Y, Kushnir A. Complete bony fusion of the mandible to the zygomatic complex and maxillary tuberosity: case report and review. *Int J Oral Maxillofac Surg.* Feb 2001;30(1):75-79.

Mahgoub L, Joynt C, Bhargava R, Davies D, El-Hakim H, Dobrovolsky W. Postnatal Diagnosis of a Baby With Multiple Rare Congenital Anomalies Including Syngnathia, Brain Dysmorphism, and Skin Pigmentation. *Cleft Palate Craniofac J.* Nov 2015;52(6):e201-204.

Martin LP, Perez MM, Garcia EG, Martin-Moro JG, Gonzalez JI, Garcia MB. Atypical case of congenital maxillomandibular fusion with duplication of the craniofacial midline. *Craniomaxillofac Trauma Reconstr.* Jun 2011;4(2):113-120.

Mir M, Iqbal S, Hafeez A, et al. Syngnathia without any other associated anomaly: A very rare case report. *Internet J Plast Surg.* 2007;4:1.

Miskinyar SAC. Congenital mandibulo-maxillary fusion. *Plastic and reconstructive surgery.* 1979;63(1):120-121.

Naikmasur VG, Sattur AP, Joshi SK, Rai A. Congenital syngnathia: case report and review of literature. *Cleft Palate Craniofac J.* Nov 2010;47(6):654-660.

Nikolic S, Lukac B, Bokun J, Jasovic A. Unilateral mandibulomaxillar synostosis as a single anomaly in a newborn. *Journal of oral and maxillofacial surgery.* 2006;64(5):843-846.

Nwoku AL, Kekere-Ekun TA. Congenital ankylosis of the mandible: Report of a case noted at birth. *Journal of maxillofacial surgery.* 1986;14:150-152.

Ozel A, Guven GS, Dilaver E, Uckan S. Unilateral complex syngnathia of the maxilla, mandible, and zygomatic complex in a newborn baby. *Br J Oral Maxillofac Surg.* Feb 2017;55(2):211-212.

Ozer AB, Karatepe U, Yildiz Altun A, Bolat E. Anesthesia-airway management in a newborn with syngnathia. *J Clin Anesth.* Nov 2016;34:615.

Patel SD, Porras S, Lypka M. Journey to chew: a case of maxillary duplication and bony syngnathia. *J Craniomaxillofac Surg.* Jan 2015;43(1):57-61.

Patterson G. Aglossia congenita with bony fusion of the jaw. *Acta Chir Scand.* 1961;122:93-95.

Poovazhagi V, Vijayakumar V, Kumudha J, Balachandran K. Congenital fusion of maxilla and mandible (bony syngnathia). *Pediatric Oncall.* 2009;6:63.

Rao S, Oak S, Wagh M, Kulkarni B. Congenital midline palatomandibular bony fusion with a mandibular cleft and a bifid tongue. *British journal of plastic surgery.* 1997;50(2):139-141.

Rezende Gde C, Pereira AK, Reis ZS, et al. Prenatal diagnosis of congenital syngnathia by 3D ultrasound and pathological correlation. *J Med Ultrason (2001).* Jan 2013;40(1):85-87.

Rough J, Hindin DI, Lee JC, Bradley JP. Correction of Unilateral Congenital Zygomatico-Mandibular Fusion. *J Craniofac Surg.* Jan 2016;27(1):e109-111.

Salleh NbM. Congenital partial fusion of the mandible and maxilla: report of a case. *Oral Surgery, Oral Medicine, Oral Pathology and Oral Radiology.* 1965;20(1):74-76.

Sarin YK, Raj P, Arya M, Dali JS. Congenital syngnathia; Turmoils and tragedy. *Journal of neonatal surgery.* 2017;6(1).

Shah RM. Palatomandibular and maxillo‐mandibular fusion, partial aglossia and cleft palate in a human embryo. Report of a case. *Teratology.* 1977;15(3):261-272.

Shams MG, Motamedi MHK, Abad HLD. Congenital fusion of the maxilla and mandible: brief case report. *Oral Surgery, Oral Medicine, Oral Pathology, Oral Radiology, and Endodontology.* 2006;102(2):e1-e3.

Simpson JR, Maves MD. Congenital syngnathia or fusion of the gums and jaws. *Otolaryngology—Head and Neck Surgery.* 1985;93(1):96-99.

Tauro DP, Kallappanavar NK, Kiran HY, Girhe VJ. Congenital zygomatico-mandibular fusion (pseudo-syngnathia?) in conjunction with unilateral anophthalmia: review of terminology and classification. *Cleft Palate Craniofac J.* Sep 2012;49(5):626-629.

Traaholt LM. Cleft lip and palate associated with alveolar synechia and filiform palpebral synechia. *Plastic and reconstructive surgery.* 1990;86(2):337-339.

Trigg DJ, Mau IT, Rosbe KW. Complete bony syngnathia: Report of a case and review. *Arch Otolaryngol Head Neck Surg.* Feb 2007;133(2):187-190.

Ugurlu K, Karsidag S, Huthut I, Yildiz K, Bas L. Congenital fusion of the maxilla and mandible. *J Craniofac Surg.* Mar 2005;16(2):287-291.

Uğurlu K, Turan T, Urganci N, Gözü A, Günay Y, Baş L. Fusion of maxillary and mandibular alveolar process together with a median mandibular cleft: a rare congenital anomaly. *Journal of cranio-maxillo-facial surgery.* 1999;27(2):105-108.

Vahidi K, Joe BN, Glenn OA, et al. Prenatal imaging of congenital maxillomandibular fusion: case report and review of the literature. *Journal of ultrasound in medicine.* 2007;26(3):381-389.

Verloes A, Raoul M, Genevieve D, et al. Bony syngnathia, vertebral segmentation defect, coloboma, microcephaly and mental retardation: confirmation of Dobrow syndrome and review of syndromal syngnathias. *Clinical dysmorphology.* 2004;13(4):205-211.

Yazdi I, Fakhraee AH. Congenital fusion of maxilla and mandible (bony syngnathia): a case report. 2000.
